# Supplementary material for: Multiplexed reverse transcription real-time polymerase chain reaction for simultaneous detection of Mayaro, Oropouche, and Oropouche-like viruses
Source: PubMed Central journal article supplement (PMC5452489; doi:10.1590/0074-02760160062), 2017-07
Supplement: 0074-0276-mioc-112-7-0510-suppl01.pdf [file 0074-0276-mioc-112-7-0510-suppl01.pdf]

# Primer-Blast analysis of Oropouche (OROV) and Mayaro (MAYV) primers

## OROV 100% match

[KP691623.1](#) Oropouche virus isolate BeH759620  
[KP691632.1](#) Oropouche virus isolate BeH759146 segment S, complete sequence  
[KP052852.1](#) Oropouche virus strain BeAn19991 segment S, complete sequence  
[KC759130.1](#) Oropouche virus strain GML-444479 segment S nucleocapsid protein (N) and nonstructural protein (NS) genes, complete cds  
[KC759127.1](#) Oropouche virus strain IQT-1690 segment S nucleocapsid protein (N) and nonstructural protein (NS) genes, complete cds  
[HM470142.1](#) Oropouche virus strain BeH505805 nucleocapsid protein gene, partial cds  
[HM470141.1](#) Oropouche virus strain BeH505768 nucleocapsid protein gene, partial cds  
[HM470140.1](#) Oropouche virus strain BeH505764 nucleocapsid protein gene, partial cds  
[HM470139.1](#) Oropouche virus strain BeH498913 nucleocapsid protein gene, partial cds  
[HM470138.1](#) Oropouche virus strain BeH708717 nucleocapsid protein gene, complete cds  
[HM470136.1](#) Oropouche virus strain BeH707157 nucleocapsid protein gene, complete cds  
[HM470135.1](#) Oropouche virus strain BeH708139 nucleocapsid protein gene, partial cds  
[HM470134.1](#) Oropouche virus strain BeH706893 nucleocapsid protein gene, complete cds  
[HM470133.1](#) Oropouche virus strain BeH706890 nucleocapsid protein gene, complete cds  
[HM470123.1](#) Oropouche virus strain BeH532422 nucleocapsid protein gene, partial cds  
[HM470122.1](#) Oropouche virus strain BeH532314 nucleocapsid protein gene, partial cds  
[HM470117.1](#) Oropouche virus strain BeAr366927 nucleocapsid protein gene, partial cds  
[HM470115.1](#) Oropouche virus strain BeH355186 nucleocapsid protein gene, complete cds  
[HM470113.1](#) Oropouche virus strain BeAr271708 nucleocapsid protein gene, partial cds  
[HM470111.1](#) Oropouche virus strain BeAr136921 nucleocapsid protein gene, complete cds  
[HM470105.1](#) Oropouche virus strain BeH472433 nucleocapsid protein gene, partial cds  
[HM470102.1](#) Oropouche virus strain BeH543100 nucleocapsid protein gene, partial cds  
[HM470137.1](#) Oropouche virus strain BeH707287 nucleocapsid protein gene, partial cds  
[HM470114.1](#) Oropouche virus strain BeH355173 nucleocapsid protein gene, partial cds  
[HQ830491.1](#) Oropouche virus isolate H759044 nucleoprotein (N) and non-structural protein (NSs) genes, complete cds  
[HQ830489.1](#) Oropouche virus isolate H759042 nucleoprotein (N) and non-structural protein (NSs) genes, complete cds  
[HQ830488.1](#) Oropouche virus isolate H759041 nucleoprotein (N) and non-structural protein (NSs) genes, complete cds  
[HQ830486.1](#) Oropouche virus isolate H759018 nucleoprotein (N) and non-structural protein (NSs) genes, complete cds  
[HQ830485.1](#) Oropouche virus isolate H759562 nucleoprotein (N) and non-structural protein (NSs) genes, complete cds  
[HQ830484.1](#) Oropouche virus isolate H759038 nucleoprotein (N) and non-structural protein (NSs) genes, complete cds  
[HQ830483.1](#) Oropouche virus isolate H75955 nucleoprotein (N) and non-structural protein (NSs) genes, complete cds  
[HQ830481.1](#) Oropouche virus isolate H759541 nucleoprotein (N) and non-structural protein (NSs) genes, complete cds  
[HQ830479.1](#) Oropouche virus isolate H758669 nucleoprotein (N) and non-structural protein (NSs) genes, complete cds  
[HQ830478.1](#) Oropouche virus isolate H758687 nucleoprotein (N) and non-structural protein (NSs) genes, complete cds  
[HQ830477.1](#) Oropouche virus isolate H708717 nucleoprotein (N) and non-structural protein (NSs) genes, complete cds  
[HQ830476.1](#) Oropouche virus isolate H707157 nucleoprotein (N) and non-structural protein (NSs) genes, complete cds  
[HQ830475.1](#) Oropouche virus isolate H708139 nucleoprotein (N) and non-structural protein (NSs) genes, complete cds  
[HQ830474.1](#) Oropouche virus isolate H706893 nucleoprotein (N) and non-structural protein (NSs) genes, complete cds  
[HQ830473.1](#) Oropouche virus isolate H706890 nucleoprotein (N) and non-structural protein (NSs) genes, complete cds  
[HQ830472.1](#) Oropouche virus isolate H543880 nucleoprotein (N) and non-structural protein (NSs) genes, complete cds  
[HQ830471.1](#) Oropouche virus isolate H543857 nucleoprotein (N) and non-structural protein (NSs) genes, complete cds  
[HQ830470.1](#) Oropouche virus isolate H543760 nucleoprotein (N) and non-structural protein (NSs) genes, complete cds  
[HQ830469.1](#) Oropouche virus isolate H543639 nucleoprotein (N) and non-structural protein (NSs) genes, complete cds  
[HQ830468.1](#) Oropouche virus isolate H543638 nucleoprotein (N) and non-structural protein (NSs) genes, complete cds  
[Q830467.1](#) Oropouche virus isolate H543629 nucleoprotein (N) and non-structural protein (NSs) genes, complete cds  
[HQ830466.1](#) Oropouche virus isolate H543100 nucleoprotein (N) and non-structural protein (NSs) genes, complete cds  
[HQ830462.1](#) Oropouche virus isolate H532422 nucleoprotein (N) and non-structural protein (NSs) genes, complete cds  
[HQ830461.1](#) Oropouche virus isolate H532314 nucleoprotein (N) and non-structural protein (NSs) genes, complete cds  
[HQ830460.1](#) Oropouche virus isolate H505805 nucleoprotein (N) and non-structural protein (NSs) genes, complete cds  
[HQ830459.1](#) Oropouche virus isolate H505768 nucleoprotein (N) and non-structural protein (NSs) genes, complete cds  
[HQ830458.1](#) Oropouche virus isolate H505764 nucleoprotein (N) and non-structural protein (NSs) genes, complete cds  
[HQ830457.1](#) Oropouche virus isolate H498913 nucleoprotein (N) and non-structural protein (NSs) genes, complete cds  
[HQ830455.1](#) Oropouche virus isolate H472433 nucleoprotein (N) and non-structural protein (NSs) genes, complete cds  
[HQ830448.1](#) Oropouche virus isolate AR366927 nucleoprotein (N) and non-structural protein (NSs) genes, complete cds  
[HQ830445.1](#) Oropouche virus isolate H271078 nucleoprotein (N) and non-structural protein (NSs) genes, complete cds

[HQ830443.1](#) Oropouche virus isolate AR136921 nucleoprotein (N) and non-structural protein (NSs) genes, complete cds  
[EF467372.1](#) Oropouche virus strain PMOH 682431 nucleocapsid protein (N) and non-structural protein (NSs) genes, complete cds  
[EF467371.1](#) Oropouche virus strain PMOH 682426 nucleocapsid protein (N) and non-structural protein (NSs) genes, complete cds  
[EF467370.1](#) Oropouche virus strain PPS 522 H 669314 nucleocapsid protein (N) and non-structural protein (NSs) genes, complete cds  
[EF467369.1](#) Oropouche virus strain PPS 523 H 669315 nucleocapsid protein (N) and non-structural protein (NSs) genes, complete cds  
[EF467368.1](#) Oropouche virus strain BeH 622544 nucleocapsid protein (N) and non-structural protein (NSs) genes, complete cds  
[AY704568.1](#) Oropouche virus strain BeH 543760 structural nucleocapsid protein (N) and non-structural protein (NSs) mRNAs, complete cds  
[AY704567.1](#) Oropouche virus strain BeH 543790 structural nucleocapsid protein (N) and non-structural protein (NSs) mRNAs, complete cds  
[AY704566.1](#) Oropouche virus strain BeH 543857 structural nucleocapsid protein (N) and non-structural protein (NSs) mRNAs, complete cds  
[AY704565.1](#) Oropouche virus strain BeH 543880 structural nucleocapsid protein (N) and non-structural protein (NSs) mRNAs, complete cds  
[AY704564.1](#) Oropouche virus strain BeH 543638 structural nucleocapsid protein (N) and non-structural protein (NSs) mRNAs, complete cds  
[AY704563.1](#) Oropouche virus strain BeH 543629 structural nucleocapsid protein (N) and non-structural protein (NSs) mRNAs, complete cds  
[AY704562.1](#) Oropouche virus strain BeH 543639 structural nucleocapsid protein (N) and non-structural protein (NSs) mRNAs, complete cds  
[AY704561.1](#) Oropouche virus strain BeH 543745 structural nucleocapsid protein (N) and non-structural protein (NSs) mRNAs, complete cds  
[AY704560.1](#) Oropouche virus strain BeH 543733 structural nucleocapsid protein (N) and non-structural protein (NSs) mRNAs, complete cds  
[AY704559.1](#) Oropouche virus strain BeH 521086 structural nucleocapsid protein (N) and non-structural protein (NSs) mRNAs, complete cds  
[AY237111.1](#) Oropouche virus segment S, complete sequence  
[AY117135.3](#) Oropouche virus strain BeAn 626990 segment S, complete sequence  
[AY993912.1](#) Oropouche virus isolate BeAn 208823 nucleocapsid protein and non-structural protein mRNAs, complete cds  
[AY993911.1](#) Oropouche virus isolate BeAn 208819 nucleocapsid protein and non-structural protein mRNAs, complete cds  
[AY993910.1](#) Oropouche virus isolate BeAn 208402 nucleocapsid protein and non-structural protein mRNAs, complete cds  
[AY993909.1](#) Oropouche virus isolate BeAn 206119 nucleocapsid protein and non-structural protein mRNAs, complete cds  
[AF164558.1](#) Oropouche virus strain GML450093 small segment nucleoprotein gene, partial cds; and non-structural protein (NSs) gene, complete cds  
[AF164557.1](#) Oropouche virus strain GML445252 small segment nucleoprotein gene, partial cds; and non-structural protein (NSs) gene, complete cds  
[AF164556.1](#) Oropouche virus strain GML444911 small segment nucleoprotein gene, partial cds; and non-structural protein (NSs) gene, complete cds  
[AF164555.1](#) Oropouche virus strain GML444477 small segment nucleoprotein gene, partial cds; and non-structural protein (NSs) gene, complete cds  
[AF164554.1](#) Oropouche virus strain IQT7085 small segment nucleoprotein gene, partial cds; and non-structural protein (NSs) gene, complete cds  
[AF164553.1](#) Oropouche virus strain 01-812-98 small segment nucleoprotein gene, partial cds; and non-structural protein (NSs) gene, complete cds  
[AF164552.1](#) Oropouche virus strain IQT4083 small segment nucleoprotein gene, partial cds; and non-structural protein (NSs) gene, complete cds  
[AF164551.1](#) Oropouche virus strain DEI209 small segment nucleoprotein gene, partial cds; and non-structural protein (NSs) gene, complete cds  
[AF164550.1](#) Oropouche virus strain MD023 small segment nucleoprotein gene, partial cds; and non-structural protein (NSs) gene, complete cds  
[AF164549.1](#) Oropouche virus strain IQT1690 small segment nucleoprotein gene, partial cds; and non-structural protein (NSs) gene, complete cds  
[AF164548.1](#) Oropouche virus strain BeH543618 small segment nucleoprotein gene, partial cds; and non-structural protein (NSs) gene, complete cds  
[AF164547.1](#) Oropouche virus strain BeH543087 small segment nucleoprotein gene, partial cds; and non-structural protein (NSs) gene, complete cds  
[AF164546.1](#) Oropouche virus strain BeH544552 small segment nucleoprotein gene, partial cds; and non-structural protein (NSs) gene, complete cds  
[AF164545.1](#) Oropouche virus strain BeH543033 small segment nucleoprotein gene, partial cds; and non-structural protein (NSs) gene, complete cds  
[AF164544.1](#) Oropouche virus strain BeH541863 small segment nucleoprotein gene, partial cds; and non-structural protein (NSs) gene, complete cds  
[AF164543.1](#) Oropouche virus strain BeH505663 small segment nucleoprotein gene, partial cds; and non-structural protein (NSs) gene, complete cds  
[AF164542.1](#) Oropouche virus strain BeH505442 small segment nucleoprotein gene, partial cds; and non-structural protein (NSs) gene, complete cds  
[AF164541.1](#) Oropouche virus strain BeH504514 small segment nucleoprotein gene, partial cds; and non-structural protein (NSs) gene, complete cds  
[AF164540.1](#) Oropouche virus strain BeH475248 small segment nucleoprotein gene, partial cds; and non-structural protein (NSs) gene, complete cds  
[AF164539.1](#) Oropouche virus strain BeAr473358 small segment nucleoprotein gene, partial cds; and non-structural protein (NSs) gene, complete cds  
[AF164538.1](#) Oropouche virus strain BeH472204 small segment nucleoprotein gene, partial cds; and non-structural protein (NSs) gene, complete cds  
[AF164537.1](#) Oropouche virus strain BeH472200 small segment nucleoprotein gene, partial cds; and non-structural protein (NSs) gene, complete cds  
[AF164536.1](#) Oropouche virus strain BeH390233 small segment nucleoprotein gene, partial cds; and non-structural protein (NSs) gene, complete cds  
[AF164535.1](#) Oropouche virus strain BeH381114 small segment nucleoprotein gene, partial cds; and non-structural protein (NSs) gene, complete cds  
[AF164534.1](#) Oropouche virus strain BeH379693 small segment nucleoprotein gene, partial cds; and non-structural protein (NSs) gene, complete cds  
[AF164533.1](#) Oropouche virus strain BeH271815 small segment nucleoprotein gene, partial cds; and non-structural protein (NSs) gene, complete cds  
[AF164532.1](#) Oropouche virus strain BeAn19991 small segment nucleoprotein gene, partial cds; and non-structural protein (NSs) gene, complete cds

### Other Bunyviruses with 100% match

[KP691629.1](#) Perdoes virus isolate BeAn790177 segment S, complete sequence  
[KJ866386.1](#) Iquitos virus strain MIS-0397 nucleocapsid protein and nonstructural protein genes, complete cds  
[KF697146.1](#) Madre de Dios virus isolate FMD 1303 nucleocapsid protein gene, complete cds  
[KF697144.1](#) Iquitos virus isolate IQT9924 nucleocapsid protein gene, complete cds  
[JQ675601.5](#) Jatobal virus nucleocapsid protein and nonstructural protein genes, complete cds  
[KF150535.1](#) Iquitos virus strain IQE3728/PER/06 nucleoprotein gene, partial cds  
[KF150525.1](#) Iquitos virus strain IQE1704/PER/05 nucleoprotein gene, partial cds  
[KF150523.1](#) Iquitos virus strain IQE1217/PER/05 nucleoprotein gene, partial cds

[KF150522.1](#) Iquitos virus strain IQE1005/PER/05 nucleoprotein gene, partial cds

[AF312382.1](#) Jatobal virus nucleoprotein (N) gene, partial cds; and non-structural protein (NSs) gene, complete cds

### 1 mismatch forward primer

[KP026181.1](#) Oropouche virus strain TRVL9760 segment S, complete sequence

[KJ866389.1](#) Madre de Dios virus strain INHRR 17a-10 structural nucleocapsid protein and nonstructural protein genes, complete cds

[KC759124.1](#) Oropouche virus strain TRVL-9760 segment S nucleocapsid protein (N) and nonstructural protein (NS) genes, complete cds

[HM470120.1](#) Oropouche virus strain BeH384193 nucleocapsid protein gene, partial cds

[HM470119.1](#) Oropouche virus strain BeH384192 nucleocapsid protein gene, partial cds

[HM470106.1](#) Oropouche virus strain BeH472435 nucleocapsid protein gene, partial cds

[HM470107.1](#) Oropouche virus strain BeAr19886 nucleocapsid protein gene, complete cds

[HQ830487.1](#) Oropouche virus isolate H759023 nucleoprotein (N) and non-structural protein (NSs) genes, complete cds

[HQ830456.1](#) Oropouche virus isolate H472435 nucleoprotein (N) and non-structural protein (NSs) genes, complete cds

[HQ830451.1](#) Oropouche virus isolate H384193 nucleoprotein (N) and non-structural protein (NSs) genes, complete cds

[HQ830450.1](#) Oropouche virus isolate H384192 nucleoprotein (N) and non-structural protein (NSs) genes, complete cds

[AF164531.1](#) Oropouche virus strain TRVL9760 small segment nucleoprotein gene, partial cds; and non-structural protein (NSs) gene, complete cds

### 1 mismatch reverse primer

[HM470112.1](#) Oropouche virus strain BeH244576 nucleocapsid protein gene, partial cds

[HM470104.1](#) Oropouche virus strain BeH390242 nucleocapsid protein gene, partial cds

[HM470103.1](#) Oropouche virus strain BeH389865 nucleocapsid protein gene, partial cds

[HM470126.1](#) Oropouche virus strain BeH541140 nucleocapsid protein gene, partial cds

[HQ830482.1](#) Oropouche virus isolate H759531 nucleoprotein (N) and non-structural protein (NSs) genes, complete cds

[HQ830454.1](#) Oropouche virus isolate H390242 nucleoprotein (N) and non-structural protein (NSs) genes, complete cds

[HQ830453.1](#) Oropouche virus isolate H389865 nucleoprotein (N) and non-structural protein (NSs) genes, complete cds

[HQ830444.1](#) Oropouche virus isolate H244576 nucleoprotein (N) and non-structural protein (NSs) genes, complete cds

[HM470110.1](#) Oropouche virus strain BeH121923 nucleocapsid protein gene, complete cds

[HM470109.1](#) Oropouche virus strain BeH29090 nucleocapsid protein gene, complete cds

[HM470108.1](#) Oropouche virus strain BeH29086 nucleocapsid protein gene, complete cds

### 1 mismatch in both forward and reverse primers

[HM470124.1](#) Oropouche virus strain BeH532490 nucleocapsid protein gene, partial cds

[HM470121.1](#) Oropouche virus strain BeH385591 nucleocapsid protein gene, partial cds

[HM470118.1](#) Oropouche virus strain BeH366781 nucleocapsid protein gene, partial cds

[HM470116.1](#) Oropouche virus strain BeH356898 nucleocapsid protein gene, partial cds

[HQ830480.1](#) Oropouche virus isolate H759525 nucleoprotein (N) and non-structural protein (NSs) genes, complete cds

[HQ830463.1](#) Oropouche virus isolate H532490 nucleoprotein (N) and non-structural protein (NSs) genes, complete cds

[HQ830452.1](#) Oropouche virus isolate H385591 nucleoprotein (N) and non-structural protein (NSs) genes, complete cds

[HQ830449.1](#) Oropouche virus isolate H366781 nucleoprotein (N) and non-structural protein (NSs) genes, complete cds

[HQ830447.1](#) Oropouche virus isolate H356898 nucleoprotein (N) and non-structural protein (NSs) genes, complete cds

### 2 mismatch forward primer, 1 reverse primer

[HM470125.1](#) Oropouche virus strain BeH532500 nucleocapsid protein gene, partial cds

[HM470101.1](#) Oropouche virus strain BeH543091 nucleocapsid protein gene, partial cds

[HQ830465.1](#) Oropouche virus isolate H543091 nucleoprotein (N) and non-structural protein (NSs) genes, complete cds

[HQ830464.1](#) Oropouche virus isolate H532500 nucleoprotein (N) and non-structural protein (NSs) genes, complete cds

### MAYV 100% match

[KT754168.1](#) Mayaro virus isolate BeAr20290, complete genome

[KP842820.1](#) Mayaro virus strain BeAr30853 Nsp1-3, Nsp4, and structural polyprotein genes, complete cds

[KP842819.1](#) Mayaro virus strain BeH256 Nsp1-3, Nsp4, and structural polyprotein genes, complete cds

[KP842818.1](#) Mayaro virus strain BeAr505411 Nsp1-3, Nsp4, and structural polyprotein genes, complete cds

[KT818520.1](#) Mayaro virus isolate BR/SJRP/LPV01/2015, complete genome

[KJ879258.1](#) Mayaro virus isolate MAYV\_BR/MT\_VG22/2012 nonstructural protein 1 gene, partial cds

[KJ879257.1](#) Mayaro virus isolate MAYV\_BR/MT\_CBA308/2012 nonstructural protein 1 gene, partial cds

[KJ879256.1](#) Mayaro virus isolate MAYV\_BR/MT\_CBA306/2012 nonstructural protein 1 gene, partial cds

[KJ879255.1](#) Mayaro virus isolate MAYV\_BR/MT\_NSL12/2012 nonstructural protein 1 gene, partial cds  
[KJ713282.1](#) Mayaro virus strain MAYV\_BR/MT\_VG20/2012 non-structural protein 1 gene, partial cds  
[KF305672.1](#) Mayaro virus isolate MT/SINOP/210/2011 nonstructural protein 1 gene, partial cds  
[AY348561.1](#) Mayaro virus nonfunctional nonstructural protein 1 (nsp1) gene, partial sequence  
[DQ138319.1](#) Mayaro virus isolate BeAr505411 nonstructural protein 1 gene, partial cds  
[AF237947.1](#) Mayaro virus, complete genome  
[KJ739869.1](#) Mayaro virus strain MAYV\_BR/MT\_VG147/2012 non-structural protein 1 gene, partial cds  
[KP842816.1](#) Mayaro virus strain FPI0179 Nsp1-3, Nsp4, and structural polyprotein genes, complete cds  
[KP842815.1](#) Mayaro virus strain FPI1761 Nsp1-3, Nsp4, and structural polyprotein genes, complete cds  
[KP842813.1](#) Mayaro virus strain FPY0046 Nsp1-3, Nsp4, and structural polyprotein genes, complete cds  
[KP842810.1](#) Mayaro virus strain TRVL15537 Nsp1-3, Nsp4, and structural polyprotein genes, complete cds  
[KP842809.1](#) Mayaro virus strain BeH186258 Nsp1-3, Nsp4, and structural polyprotein genes, complete cds  
[KP842808.1](#) Mayaro virus strain IQU3056 Nsp1-3, Nsp4, and structural polyprotein genes, complete cds  
[KP842807.1](#) Mayaro virus strain Ohio Nsp1-3, Nsp4, and structural polyprotein genes, complete cds  
[KP842801.1](#) Mayaro virus strain IQE2777 Nsp1-3, Nsp4, and structural polyprotein genes, complete cds  
[KP842800.1](#) Mayaro virus strain ARV0565 Nsp1-3, Nsp4, and structural polyprotein genes, complete cds  
[KP842799.1](#) Mayaro virus strain MAYV15A Nsp1-3, Nsp4, and structural polyprotein genes, complete cds  
[KP842798.1](#) Mayaro virus strain MAYV14A Nsp1-3, Nsp4, and structural polyprotein genes, complete cds  
[KP842797.1](#) Mayaro virus strain MAYV13A Nsp1-3, Nsp4, and structural polyprotein genes, complete cds  
[KP842796.1](#) Mayaro virus strain MAYV12A Nsp1-3, Nsp4, and structural polyprotein genes, complete cds  
[KP842795.1](#) Mayaro virus strain MAYV11A Nsp1-3, Nsp4, and structural polyprotein genes, complete cds  
[KP842794.1](#) Mayaro virus strain MAYV16A Nsp1-3, Nsp4, and structural polyprotein genes, complete cds  
[KJ013266.2](#) Mayaro virus strain BNI-1, complete genome  
[KJ879259.1](#) Mayaro virus isolate MAYV\_BR/MT\_CBA301/2012 nonstructural protein 1 gene, partial cds  
[KJ870987.1](#) Mayaro virus strain MAYV\_BR/MT\_CBA322/2012 nonstructural protein 1 gene, partial cds  
[DQ138318.1](#) Mayaro virus isolate Uruma nonstructural protein 1 gene, partial cd  
[DQ138316.1](#) Mayaro virus isolate OBS2248 nonstructural protein 1 gene, partial cds  
[DQ138315.1](#) Mayaro virus isolate BeH504378 nonstructural protein 1 gene, partial cds  
[U94602.1](#) Mayaro virus nonstructural protein 1 (nsP1) gene, partial cds

#### 1 mismatch

[KJ879254.1](#) Mayaro virus isolate MAYV\_BR/MT\_CBA305/2012 nonstructural protein 1 gene, partial cds  
[KJ682316.1](#) Mayaro virus strain MAYV\_BR/MT\_CBA9/2012 non-structural protein 1 gene, partial cds  
[KP842817.1](#) Mayaro virus strain FVB0069 Nsp1-3, Nsp4, and structural polyprotein genes, complete cds  
[KP842814.1](#) Mayaro virus strain FVB0112 Nsp1-3, Nsp4, and structural polyprotein genes, complete cds  
[KP842812.1](#) Mayaro virus strain FMD3213 Nsp1-3, Nsp4, and structural polyprotein genes, complete cds  
[KP842811.1](#) Mayaro virus strain FMD0641 Nsp1-3, Nsp4, and structural polyprotein genes, complete cds  
[KP842806.1](#) Mayaro virus strain FSB1131 Nsp1-3, Nsp4, and structural polyprotein genes, complete cds  
[KP842805.1](#) Mayaro virus strain FSB0319 Nsp1-3, Nsp4, and structural polyprotein genes, complete cds  
[KM400591.1](#) Mayaro virus strain Acre27, complete genome  
[KJ879253.1](#) Mayaro virus isolate MAYV\_BR/MT\_CBA230/2012 nonstructural protein 1 gene, partial cds  
[KJ879333.1](#) Mayaro virus isolate MAYV\_BR/MT\_SOR246/2012 nonstructural protein 1 gene, partial cds  
[DQ001069.1](#) Mayaro virus strain MAYLC from French Guiana, complete genome
